# Supplementary material for: Approaches to Parameter Estimation from Model Neurons and Biological Neurons
Source: MDPI journal article supplement (doi:10.3390/a15050168), 2022-05-20
Supplement: s1 [file s1]

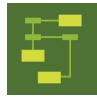

*Supplementary information*

## **Approaches to Parameter Estimation from Model Neurons and Biological Neurons**

Alain Nogaret <sup>1,\*</sup>

1. Nine-ion channel conductance model used to infer the parameters of the songbird neuron in Figure 1.
2. Links to parameter inference software

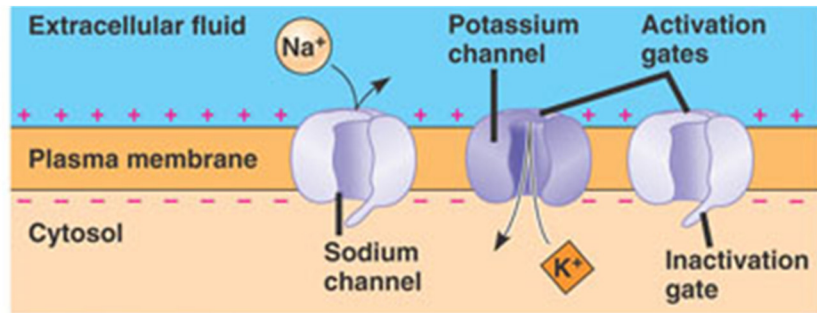

### Dynamics of the Potassium-activation gate:

$$\frac{dn(t)}{dt} = \frac{n_{\infty}(V) - n(t)}{\tau_n(V)}$$

$$n_{\infty}(V) = \frac{1}{2} \left[ 1 + \tanh \left( \frac{V - V_n}{dV_n} \right) \right]$$

$$\tau_n(V) = t_{0n} + \epsilon_n \left[ 1 - \tanh^2 \left( \frac{V - V_n}{dV_n} \right) \right]$$

5 model parameters

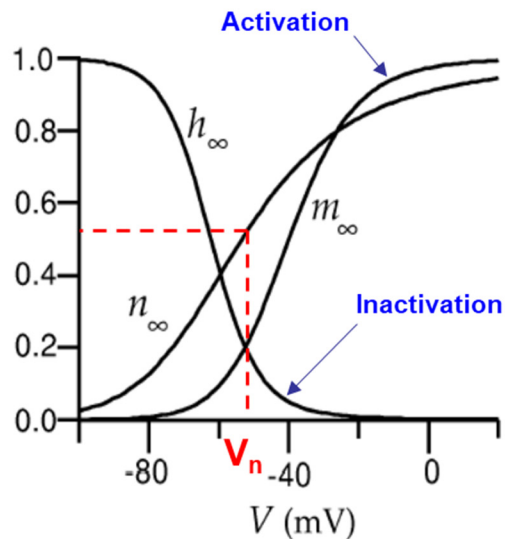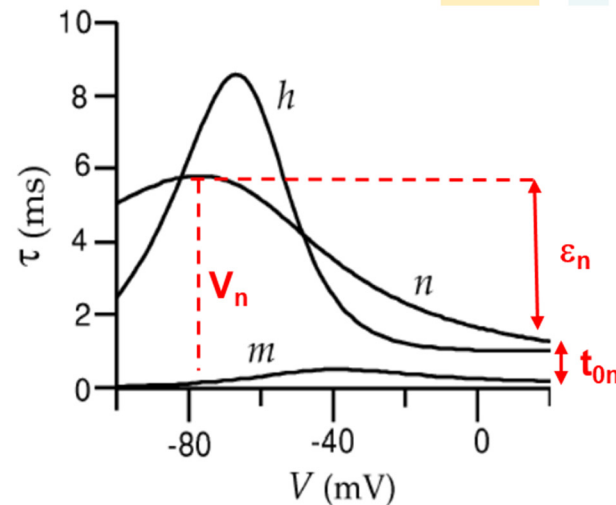

### Sodium activation and inactivation gates:

10 model parameters

**Figure S1:** The generic rate equation of a gate variable, here  $n(t)$ .  $V_n$  is the threshold of the sigmoidal activation.  $dV_n$  is the width of the transition from the open to the closed state of the gate.  $dV_n > 0$  gives an activation curve;  $dV_n < 0$ , inactivation. The recovery time  $\tau_n(V)$  of most gate variables has a Bell-shaped curve defined by 3 parameters:  $V_n, t_{0n}, \epsilon_n$ . This dependence describes all activation gates and almost all inactivation gates the exception being the K2 and CaT inactivation recovery times which exhibit a rectifying behaviour and a biexponential dependence respectively.

The equation of motion governing the membrane voltage is:

$$C \frac{dV(t)}{dt} = -J_{NaT} - J_{NaP} - J_{K1} - J_{K2} - J_{K3} - J_{CaL} - J_{CaT} - J_{HCN} - J_{Leak} + I_{data}(t)/A, \quad (1)$$

The rate equations for activation and inactivation gates are:

$$\begin{aligned} \frac{dm(t)}{dt} &= \frac{m_{\infty}(V) - m(t)}{\tau_m(V)}, \\ \frac{dh(t)}{dt} &= \frac{h_{\infty}(V) - h(t)}{\tau_h(V)}, \end{aligned} \quad (2)$$

with steady state activation and time delays given by:

$$\begin{aligned} m_{\infty}(V) &= \frac{1}{2} \left( 1 + \tanh \frac{V - V_m}{dV_m} \right), & \tau_m(V) &= t_{0m} + \varepsilon_m \left( 1 - \tanh^2 \frac{V - V_m}{dV_m} \right), \\ h_{\infty}(V) &= \frac{1}{2} \left( 1 + \tanh \frac{V - V_h}{dV_h} \right), & \tau_h(V) &= t_{0h} + \varepsilon_h \left( 1 - \tanh^2 \frac{V - V_h}{dV_h} \right), \end{aligned} \quad (3)$$

The rectifying behaviour of the recovery time constant of the K2 current was formally described in the data assimilation code with the following equation:

$$\tau_h(V) = t_{0h} + \varepsilon_h \left( 1 - \tanh^2 \frac{\delta_h}{dV_{th}} + \frac{1}{2} (1 - \tanh(1 - V_{th} - \delta_h)) \left( \tanh^2 \frac{\delta_h}{dV_{th}} - \tanh^2 \frac{V - V_{th}}{dV_{th}} \right) \right). \quad (4)$$

The bi-exponential dependence of the CaT recovery time constant was described by the following equation:

$$\tau_h(V) = t_{0h} + \varepsilon_h \frac{\left( 1 + \tanh \left( \frac{V - V_{h1}}{dV_{h1}} \right) \right) \left( 1 - \tanh \left( \frac{V - V_{h2}}{dV_{h2}} \right) \right)}{1 + \tanh \left( \frac{V - V_{h1}}{dV_{h1}} \right) \tanh \left( \frac{V - V_{h2}}{dV_{h2}} \right)} \left( (1 - \tanh(V - V_h)) \tanh \left( \left( \frac{1}{dV_{h1}} + \frac{1}{dV_{h2}} \right) (V - V_h) \right) \right) \quad (5)$$

The ionic currents are given in Figure B. Note that no two ionic current have the same mathematical form due to either different gate exponents or gate kinetics.

| ID   | Channel                                                   | Current density                     | Nominal conductance              |
|------|-----------------------------------------------------------|-------------------------------------|----------------------------------|
| NaT  | Fast and transient Na <sup>+</sup> current                | $J_{NaT} = g_{NaT}m^3h(E_{Na} - V)$ | $g_{NaT}=110\text{mS.cm}^{-2}$   |
| NaP  | Persistent Na <sup>+</sup> current                        | $J_{NaP} = g_{NaP}m(E_{Na} - V)$    | $g_{NaP}=0.064\text{mS.cm}^{-2}$ |
| K1   | Transient depolarization activated K <sup>+</sup> current | $J_{K1} = g_{K1}m^4(E_K - V)$       | $g_{K1}=5\text{mS.cm}^{-2}$      |
| K2   | Rapidly inactivating K <sup>+</sup> current (A current)   | $J_{K2} = g_{K2}m^4h(E_K - V)$      | $g_{K2}=12\text{mS.cm}^{-2}$     |
| K3   | Ca <sup>2+</sup> activated K <sup>+</sup> current         | $J_{K3} = g_{K3}m(E_K - V)$         | $g_{K3}=9.1\text{mS.cm}^{-2}$    |
| CaL  | High threshold Ca <sup>2+</sup> current                   | $J_{CaL} = \rho m^2J_{Ca}$          | -                                |
| CaT  | Low threshold Ca <sup>2+</sup> current                    | $J_{CaT} = m^2hJ_{Ca}$              | -                                |
| HCN  | Hyperpolarization-activated cation current                | $J_{HCN} = g_{HCN}h(E_{HCN} - V)$   | $g_{HCN}=0.092\text{mS.cm}^{-2}$ |
| Leak | Leakage channels (K & Na)                                 | $J_L = g_L(E_L - V)$                | $g_L=0.066\text{mS.cm}^{-2}$     |

Calcium current prefactor:

$$J_{Ca}=\left(\frac{g_{out}-g_m\exp(V/V_T)}{\exp(V/V_T)-1}\right)\times V$$

Goldman-Hodgkin-Katz equation

12 state variables, 71 parameters  
12 coupled non linear differential equations

Figure S2: Mathematical form of the 9 ionic currents used to model the songbird neuron in Figure 1 of the manuscript.

## 2. Links to parameter inference methods online.

- Interior Point Optimization: <https://github.com/coin-or/Ipopt>
- 4DVar: [http://www.met.reading.ac.uk/~darc/training/ecmwf\\_collaborative\\_training/var\\_practice.pdf](http://www.met.reading.ac.uk/~darc/training/ecmwf_collaborative_training/var_practice.pdf)
- Stochastic gradient descent which can be adapted for non convex problems:  
<https://github.com/arseniyturin/SGD-From-Scratch>
- LASSO: <https://github.com/lasso-gmbh>
