# Supplementary material for: Approaches to Parameter Estimation from Model Neurons and Biological Neurons
Source: MDPI journal article supplement (doi:10.3390/a15050168), 2022-05-20
Supplement: s1 [file s1]

Archive with 1 entries (1 files):
- algorithms-1722477 supplyment.pdf
